# Supplementary material for: Machine learning methods for automated classification of tumors with papillary thyroid carcinoma-like nuclei: A quantitative analysis
Source: PLoS One. 2021 Sep 22;16(9):e0257635. doi: 10.1371/journal.pone.0257635 (PMC8457451; doi:10.1371/journal.pone.0257635)
Supplement: S1 File — Full list of classification results on the Tharun and Thompson dataset for all trained feature-based classification and deep learning-based classification variants. (XLSX) [file pone.0257635.s003.xlsx]

## Sheet: T&T FeatureBasedClass
quantile_transform	scaler	feature_selection_method	n_features	classifier	accuracy_train	accuracy_val	accuracy_test
True	none	sfs	22	SVC	0.974359	0.863782	0.897436
True	none	sfs	24	SVC	0.974359	0.863782	0.891026
True	none	sfs	25	SVC	0.974359	0.863782	0.884615
False	std	chi2	25	LogisticRegression	0.902244	0.862179	0.865385
True	std	sfs	22	SVC	0.975962	0.860577	0.884615
True	none	sfs	23	SVC	0.979167	0.860577	0.891026
True	std	sfs	25	SVC	0.975962	0.858974	0.878205
True	std	sfs	19	SVC	0.972756	0.857372	0.871795
True	std	sfs	23	SVC	0.975962	0.857372	0.878205
True	std	sfs	24	SVC	0.975962	0.857372	0.878205
True	none	sfs	19	SVC	0.974359	0.857372	0.865385
True	none	none	-1	SVC	0.972756	0.855769	0.865385
True	none	sfs	21	SVC	0.969551	0.855769	0.884615
True	std	sfs	21	SVC	0.969551	0.854167	0.897436
True	none	sfs	20	SVC	0.964744	0.852564	0.878205
False	std	chi2	22	LogisticRegression	0.894231	0.849359	0.839744
False	std	chi2	23	LogisticRegression	0.897436	0.849359	0.839744
False	std	sfs	23	SVC	0.966346	0.849359	0.878205
True	std	sfs	20	SVC	0.972756	0.849359	0.878205
True	none	sfs	16	SVC	0.972756	0.849359	0.903846
False	std	chi2	24	LogisticRegression	0.894231	0.847756	0.852564
False	std	sfs	17	SVC	0.955128	0.847756	0.852564
False	std	sfs	20	SVC	0.972756	0.847756	0.878205
True	std	sfs	16	SVC	0.963141	0.847756	0.878205
True	std	sfs	18	SVC	0.964744	0.847756	0.871795
True	none	sfs	18	SVC	0.972756	0.847756	0.871795
False	std	sfs	21	SVC	0.979167	0.846154	0.878205
False	std	sfs	22	SVC	0.969551	0.846154	0.878205
False	std	sfs	19	RandomForestClassifier	0.998397	0.846154	0.833333
True	std	sfs	25	RandomForestClassifier	0.988782	0.846154	0.833333
True	none	sfs	25	RandomForestClassifier	0.988782	0.846154	0.833333
False	none	sfs	19	RandomForestClassifier	0.998397	0.846154	0.833333
True	none	chi2	23	SVC	0.9375	0.846154	0.878205
False	std	chi2	17	LogisticRegression	0.873397	0.844551	0.833333
False	std	chi2	18	LogisticRegression	0.875	0.844551	0.839744
False	std	none	-1	LogisticRegression	0.955128	0.844551	0.852564
False	std	sfs	16	SVC	0.958333	0.844551	0.820513
False	std	sfs	16	RandomForestClassifier	0.998397	0.844551	0.839744
True	std	sfs	2	SVC	0.88141	0.844551	0.852564
True	none	sfs	10	SVC	0.950321	0.844551	0.858974
False	none	sfs	8	GaussianNB	0.913462	0.844551	0.814103
False	none	sfs	16	RandomForestClassifier	0.998397	0.844551	0.839744
True	none	chi2	20	SVC	0.945513	0.844551	0.878205
True	none	chi2	24	SVC	0.955128	0.844551	0.858974
True	std	chi2	25	LogisticRegression	0.897436	0.842949	0.858974
True	std	none	-1	LogisticRegression	0.934295	0.842949	0.846154
False	std	sfs	15	SVC	0.975962	0.842949	0.826923
False	std	sfs	18	SVC	0.974359	0.842949	0.865385
False	std	sfs	24	SVC	0.969551	0.842949	0.865385
False	std	sfs	25	SVC	0.955128	0.842949	0.865385
True	none	sfs	11	SVC	0.958333	0.842949	0.871795
False	none	sfs	7	GaussianNB	0.907051	0.842949	0.833333
False	none	sfs	10	GaussianNB	0.916667	0.842949	0.814103
True	none	chi2	21	SVC	0.951923	0.842949	0.852564
False	std	chi2	16	LogisticRegression	0.873397	0.841346	0.814103
False	std	chi2	21	LogisticRegression	0.883013	0.841346	0.820513
True	std	chi2	21	SVC	0.934295	0.841346	0.852564
True	std	chi2	23	SVC	0.923077	0.841346	0.839744
False	std	sfs	19	SVC	0.967949	0.841346	0.865385
False	std	sfs	24	LogisticRegression	0.916667	0.841346	0.826923
False	std	sfs	25	LogisticRegression	0.916667	0.841346	0.820513
True	std	sfs	10	SVC	0.942308	0.841346	0.865385
True	std	sfs	17	SVC	0.967949	0.841346	0.878205
True	none	chi2	19	SVC	0.932692	0.841346	0.884615
True	none	chi2	22	SVC	0.950321	0.841346	0.858974
True	std	chi2	20	SVC	0.924679	0.839744	0.865385
True	std	chi2	22	SVC	0.929487	0.839744	0.839744
True	std	none	-1	SVC	0.94391	0.839744	0.891026
False	std	sfs	12	SVC	0.947115	0.839744	0.814103
False	std	sfs	21	RandomForestClassifier	1	0.839744	0.865385
False	std	sfs	25	RandomForestClassifier	0.990385	0.839744	0.833333
True	std	sfs	11	SVC	0.955128	0.839744	0.884615
True	std	sfs	14	SVC	0.967949	0.839744	0.884615
True	std	sfs	15	SVC	0.963141	0.839744	0.871795
True	std	sfs	20	RandomForestClassifier	0.998397	0.839744	0.826923
True	std	sfs	21	RandomForestClassifier	1	0.839744	0.865385
True	none	sfs	14	SVC	0.974359	0.839744	0.833333
True	none	sfs	17	SVC	0.967949	0.839744	0.891026
True	none	sfs	20	RandomForestClassifier	0.998397	0.839744	0.826923
True	none	sfs	21	RandomForestClassifier	1	0.839744	0.865385
False	none	sfs	5	GaussianNB	0.889423	0.839744	0.852564
False	none	sfs	9	GaussianNB	0.916667	0.839744	0.801282
False	none	sfs	21	RandomForestClassifier	1	0.839744	0.865385
False	none	sfs	25	RandomForestClassifier	0.990385	0.839744	0.833333
False	std	chi2	15	LogisticRegression	0.876603	0.838141	0.820513
False	std	chi2	19	LogisticRegression	0.883013	0.838141	0.846154
False	std	chi2	20	LogisticRegression	0.886218	0.838141	0.839744
True	std	chi2	19	SVC	0.929487	0.838141	0.865385
True	std	chi2	24	SVC	0.924679	0.838141	0.833333
True	std	chi2	20	LogisticRegression	0.889423	0.838141	0.852564
True	std	chi2	22	LogisticRegression	0.892628	0.838141	0.852564
True	std	chi2	24	LogisticRegression	0.899038	0.838141	0.852564
False	std	sfs	9	SVC	0.940705	0.838141	0.801282
False	std	sfs	23	LogisticRegression	0.916667	0.838141	0.820513
True	std	sfs	22	RandomForestClassifier	0.998397	0.838141	0.846154
True	none	sfs	9	SVC	0.958333	0.838141	0.865385
True	none	sfs	13	SVC	0.964744	0.838141	0.891026
True	none	sfs	22	RandomForestClassifier	0.998397	0.838141	0.846154
True	none	chi2	18	SVC	0.934295	0.838141	0.846154
True	none	chi2	25	SVC	0.947115	0.838141	0.833333
False	std	chi2	9	LogisticRegression	0.854167	0.836538	0.852564
False	std	chi2	14	LogisticRegression	0.862179	0.836538	0.846154
True	std	chi2	18	LogisticRegression	0.88141	0.836538	0.839744
True	std	chi2	23	LogisticRegression	0.891026	0.836538	0.852564
False	std	sfs	19	LogisticRegression	0.911859	0.836538	0.833333
False	std	sfs	22	LogisticRegression	0.916667	0.836538	0.814103
True	std	sfs	25	LogisticRegression	0.93109	0.836538	0.846154
True	std	sfs	15	RandomForestClassifier	0.99359	0.836538	0.826923
True	std	sfs	23	RandomForestClassifier	1	0.836538	0.826923
True	none	sfs	12	SVC	0.975962	0.836538	0.865385
True	none	sfs	15	SVC	0.980769	0.836538	0.897436
True	none	sfs	15	RandomForestClassifier	0.99359	0.836538	0.826923
True	none	sfs	23	RandomForestClassifier	1	0.836538	0.826923
False	none	sfs	11	GaussianNB	0.919872	0.836538	0.833333
False	std	chi2	12	LogisticRegression	0.863782	0.834936	0.839744
False	std	chi2	13	LogisticRegression	0.871795	0.834936	0.846154
True	std	chi2	25	SVC	0.924679	0.834936	0.839744
True	std	chi2	19	LogisticRegression	0.879808	0.834936	0.852564
False	std	sfs	13	SVC	0.972756	0.834936	0.852564
False	std	sfs	14	SVC	0.966346	0.834936	0.814103
False	std	sfs	7	GaussianNB	0.905449	0.834936	0.839744
False	std	sfs	9	GaussianNB	0.916667	0.834936	0.801282
False	std	sfs	20	LogisticRegression	0.910256	0.834936	0.833333
False	std	sfs	21	LogisticRegression	0.908654	0.834936	0.820513
False	std	sfs	23	RandomForestClassifier	0.998397	0.834936	0.807692
True	std	sfs	12	SVC	0.959936	0.834936	0.871795
True	std	sfs	13	SVC	0.959936	0.834936	0.871795
True	std	sfs	16	RandomForestClassifier	1	0.834936	0.839744
True	none	sfs	2	SVC	0.889423	0.834936	0.826923
True	none	sfs	16	RandomForestClassifier	1	0.834936	0.839744
False	none	sfs	14	GaussianNB	0.919872	0.834936	0.833333
False	none	sfs	23	RandomForestClassifier	0.998397	0.834936	0.807692
False	std	chi2	11	LogisticRegression	0.860577	0.833333	0.858974
True	std	chi2	14	SVC	0.910256	0.833333	0.852564
True	std	chi2	11	LogisticRegression	0.86859	0.833333	0.878205
True	std	chi2	21	LogisticRegression	0.886218	0.833333	0.852564
False	std	sfs	5	GaussianNB	0.889423	0.833333	0.839744
False	std	sfs	8	GaussianNB	0.913462	0.833333	0.833333
False	std	sfs	11	LogisticRegression	0.894231	0.833333	0.814103
False	std	sfs	14	RandomForestClassifier	1	0.833333	0.826923
False	std	sfs	15	RandomForestClassifier	1	0.833333	0.852564
False	std	sfs	18	RandomForestClassifier	0.996795	0.833333	0.852564
True	std	sfs	8	SVC	0.942308	0.833333	0.871795
True	std	sfs	19	RandomForestClassifier	1	0.833333	0.826923
True	none	sfs	8	SVC	0.942308	0.833333	0.884615
True	none	sfs	19	LogisticRegression	0.88141	0.833333	0.839744
True	none	sfs	19	RandomForestClassifier	1	0.833333	0.826923
False	none	sfs	14	RandomForestClassifier	1	0.833333	0.826923
False	none	sfs	15	RandomForestClassifier	1	0.833333	0.852564
False	none	sfs	18	RandomForestClassifier	0.996795	0.833333	0.852564
True	none	chi2	16	LogisticRegression	0.854167	0.833333	0.852564
True	none	chi2	18	LogisticRegression	0.852564	0.833333	0.852564
True	none	chi2	14	SVC	0.924679	0.833333	0.871795
False	std	chi2	7	LogisticRegression	0.842949	0.831731	0.833333
True	std	chi2	1	SVC	0.831731	0.831731	0.814103
True	std	chi2	18	SVC	0.907051	0.831731	0.865385
True	std	chi2	25	RandomForestClassifier	1	0.831731	0.839744
False	std	none	-1	SVC	0.9375	0.831731	0.846154
True	none	none	-1	LogisticRegression	0.884615	0.831731	0.846154
False	std	sfs	21	KNeighborsClassifier	0.948718	0.831731	0.839744
False	std	sfs	23	KNeighborsClassifier	0.947115	0.831731	0.839744
False	std	sfs	3	GaussianNB	0.878205	0.831731	0.826923
False	std	sfs	13	LogisticRegression	0.895833	0.831731	0.833333
False	std	sfs	20	RandomForestClassifier	1	0.831731	0.839744
True	std	sfs	9	SVC	0.934295	0.831731	0.891026
True	std	sfs	18	RandomForestClassifier	0.998397	0.831731	0.833333
True	std	sfs	24	RandomForestClassifier	0.99359	0.831731	0.833333
True	none	sfs	18	LogisticRegression	0.879808	0.831731	0.839744
True	none	sfs	18	RandomForestClassifier	0.998397	0.831731	0.833333
True	none	sfs	24	RandomForestClassifier	0.99359	0.831731	0.833333
False	none	sfs	20	RandomForestClassifier	1	0.831731	0.839744
True	none	chi2	25	RandomForestClassifier	1	0.831731	0.839744
True	none	chi2	9	SVC	0.905449	0.831731	0.820513
True	none	chi2	15	SVC	0.934295	0.831731	0.852564
True	std	chi2	1	GaussianNB	0.842949	0.830128	0.839744
True	std	chi2	1	LogisticRegression	0.839744	0.830128	0.839744
False	std	none	-1	RandomForestClassifier	0.99359	0.830128	0.846154
True	none	none	-1	RandomForestClassifier	1	0.830128	0.852564
True	std	none	-1	RandomForestClassifier	1	0.830128	0.852564
False	std	sfs	5	SVC	0.916667	0.830128	0.814103
False	std	sfs	8	SVC	0.945513	0.830128	0.801282
False	std	sfs	11	SVC	0.950321	0.830128	0.814103
False	std	sfs	20	KNeighborsClassifier	0.94391	0.830128	0.839744
False	std	sfs	22	KNeighborsClassifier	0.94391	0.830128	0.807692
False	std	sfs	25	KNeighborsClassifier	0.945513	0.830128	0.846154
False	std	sfs	14	LogisticRegression	0.897436	0.830128	0.833333
False	std	sfs	22	RandomForestClassifier	0.996795	0.830128	0.846154
True	std	sfs	13	RandomForestClassifier	1	0.830128	0.833333
True	none	sfs	13	RandomForestClassifier	1	0.830128	0.833333
False	none	none	-1	RandomForestClassifier	0.99359	0.830128	0.846154
False	none	sfs	7	KNeighborsClassifier	0.894231	0.830128	0.826923
False	none	sfs	12	KNeighborsClassifier	0.921474	0.830128	0.807692
False	none	sfs	3	GaussianNB	0.878205	0.830128	0.826923
False	none	sfs	6	GaussianNB	0.900641	0.830128	0.839744
False	none	sfs	22	RandomForestClassifier	0.996795	0.830128	0.846154
True	none	chi2	1	GaussianNB	0.842949	0.830128	0.839744
True	none	chi2	15	LogisticRegression	0.860577	0.830128	0.858974
True	none	chi2	17	LogisticRegression	0.854167	0.830128	0.852564
True	none	chi2	23	LogisticRegression	0.852564	0.830128	0.846154
True	none	chi2	1	SVC	0.842949	0.830128	0.826923
True	none	chi2	16	SVC	0.939103	0.830128	0.833333
False	std	chi2	8	LogisticRegression	0.854167	0.828526	0.826923
False	std	chi2	10	LogisticRegression	0.862179	0.828526	0.852564
True	std	chi2	15	SVC	0.913462	0.828526	0.852564
True	std	chi2	17	SVC	0.897436	0.828526	0.839744
True	std	chi2	14	LogisticRegression	0.86859	0.828526	0.858974
True	std	chi2	15	LogisticRegression	0.873397	0.828526	0.839744
True	std	chi2	17	LogisticRegression	0.870192	0.828526	0.839744
False	std	sfs	4	SVC	0.915064	0.828526	0.820513
False	std	sfs	24	KNeighborsClassifier	0.948718	0.828526	0.826923
False	std	sfs	10	GaussianNB	0.919872	0.828526	0.801282
False	std	sfs	24	GaussianNB	0.916667	0.828526	0.839744
False	std	sfs	25	GaussianNB	0.921474	0.828526	0.833333
False	std	sfs	12	LogisticRegression	0.895833	0.828526	0.833333
False	std	sfs	15	LogisticRegression	0.902244	0.828526	0.820513
False	std	sfs	16	LogisticRegression	0.905449	0.828526	0.820513
False	std	sfs	17	LogisticRegression	0.910256	0.828526	0.833333
False	std	sfs	13	RandomForestClassifier	0.998397	0.828526	0.846154
True	std	sfs	1	SVC	0.831731	0.828526	0.814103
True	std	sfs	7	SVC	0.9375	0.828526	0.839744
True	none	sfs	4	SVC	0.918269	0.828526	0.833333
True	none	sfs	7	SVC	0.9375	0.828526	0.858974
True	none	sfs	16	LogisticRegression	0.88141	0.828526	0.833333
True	none	sfs	23	LogisticRegression	0.88141	0.828526	0.833333
True	none	sfs	24	LogisticRegression	0.887821	0.828526	0.839744
True	none	sfs	25	LogisticRegression	0.892628	0.828526	0.826923
False	none	sfs	8	KNeighborsClassifier	0.902244	0.828526	0.775641
False	none	sfs	18	KNeighborsClassifier	0.915064	0.828526	0.807692
False	none	sfs	15	GaussianNB	0.921474	0.828526	0.826923
False	none	sfs	13	RandomForestClassifier	0.998397	0.828526	0.846154
True	none	chi2	1	LogisticRegression	0.833333	0.828526	0.839744
True	none	chi2	10	LogisticRegression	0.862179	0.828526	0.852564
True	none	chi2	11	LogisticRegression	0.862179	0.828526	0.846154
True	none	chi2	21	LogisticRegression	0.852564	0.828526	0.852564
True	none	chi2	22	LogisticRegression	0.852564	0.828526	0.852564
True	none	chi2	13	SVC	0.927885	0.828526	0.852564
True	none	chi2	17	SVC	0.907051	0.828526	0.852564
True	std	chi2	13	SVC	0.894231	0.826923	0.839744
True	std	chi2	16	SVC	0.894231	0.826923	0.852564
True	std	chi2	10	LogisticRegression	0.870192	0.826923	0.878205
True	std	chi2	12	LogisticRegression	0.86859	0.826923	0.865385
True	std	chi2	16	LogisticRegression	0.875	0.826923	0.833333
False	std	sfs	10	SVC	0.93109	0.826923	0.814103
False	std	sfs	13	KNeighborsClassifier	0.918269	0.826923	0.820513
False	std	sfs	4	GaussianNB	0.88141	0.826923	0.839744
False	std	sfs	6	GaussianNB	0.899038	0.826923	0.826923
False	std	sfs	18	LogisticRegression	0.907051	0.826923	0.826923
False	std	sfs	24	RandomForestClassifier	1	0.826923	0.846154
True	std	sfs	6	SVC	0.93109	0.826923	0.833333
True	std	sfs	20	GaussianNB	0.894231	0.826923	0.814103
True	none	sfs	6	SVC	0.945513	0.826923	0.846154
True	none	sfs	20	GaussianNB	0.894231	0.826923	0.814103
True	none	sfs	1	LogisticRegression	0.833333	0.826923	0.839744
True	none	sfs	17	LogisticRegression	0.879808	0.826923	0.833333
True	none	sfs	22	LogisticRegression	0.886218	0.826923	0.846154
False	none	sfs	3	KNeighborsClassifier	0.884615	0.826923	0.826923
False	none	sfs	15	KNeighborsClassifier	0.916667	0.826923	0.820513
False	none	sfs	4	GaussianNB	0.88141	0.826923	0.839744
False	none	sfs	19	GaussianNB	0.919872	0.826923	0.858974
False	none	sfs	21	GaussianNB	0.919872	0.826923	0.846154
False	none	sfs	24	RandomForestClassifier	1	0.826923	0.846154
True	none	chi2	14	LogisticRegression	0.857372	0.826923	0.852564
True	none	chi2	19	LogisticRegression	0.852564	0.826923	0.852564
True	none	chi2	20	LogisticRegression	0.850962	0.826923	0.852564
True	none	chi2	11	SVC	0.918269	0.826923	0.852564
True	none	chi2	12	SVC	0.908654	0.826923	0.865385
False	std	chi2	14	RandomForestClassifier	0.982372	0.825321	0.839744
True	std	chi2	15	KNeighborsClassifier	0.870192	0.825321	0.814103
True	std	chi2	19	KNeighborsClassifier	0.865385	0.825321	0.820513
True	std	chi2	20	KNeighborsClassifier	0.88141	0.825321	0.833333
True	std	chi2	23	KNeighborsClassifier	0.863782	0.825321	0.852564
True	std	chi2	24	KNeighborsClassifier	0.876603	0.825321	0.839744
True	std	chi2	25	KNeighborsClassifier	0.871795	0.825321	0.833333
True	std	chi2	13	LogisticRegression	0.866987	0.825321	0.858974
True	std	chi2	23	RandomForestClassifier	0.99359	0.825321	0.846154
False	std	sfs	11	GaussianNB	0.921474	0.825321	0.814103
False	std	sfs	23	GaussianNB	0.915064	0.825321	0.839744
False	std	sfs	11	RandomForestClassifier	0.995192	0.825321	0.820513
True	std	sfs	3	SVC	0.903846	0.825321	0.794872
True	std	sfs	4	SVC	0.910256	0.825321	0.852564
True	std	sfs	10	RandomForestClassifier	1	0.825321	0.820513
True	std	sfs	14	RandomForestClassifier	1	0.825321	0.833333
True	none	sfs	3	SVC	0.910256	0.825321	0.826923
True	none	sfs	20	LogisticRegression	0.88141	0.825321	0.833333
True	none	sfs	10	RandomForestClassifier	1	0.825321	0.820513
True	none	sfs	14	RandomForestClassifier	1	0.825321	0.833333
False	none	chi2	14	RandomForestClassifier	0.982372	0.825321	0.839744
False	none	sfs	4	KNeighborsClassifier	0.891026	0.825321	0.846154
False	none	sfs	14	KNeighborsClassifier	0.913462	0.825321	0.794872
False	none	sfs	20	GaussianNB	0.919872	0.825321	0.852564
False	none	sfs	23	GaussianNB	0.913462	0.825321	0.865385
False	none	sfs	11	RandomForestClassifier	0.995192	0.825321	0.820513
True	none	chi2	15	KNeighborsClassifier	0.870192	0.825321	0.814103
True	none	chi2	19	KNeighborsClassifier	0.865385	0.825321	0.820513
True	none	chi2	20	KNeighborsClassifier	0.88141	0.825321	0.833333
True	none	chi2	23	KNeighborsClassifier	0.863782	0.825321	0.846154
True	none	chi2	25	KNeighborsClassifier	0.871795	0.825321	0.833333
True	none	chi2	9	LogisticRegression	0.862179	0.825321	0.858974
True	none	chi2	13	LogisticRegression	0.863782	0.825321	0.846154
True	none	chi2	24	LogisticRegression	0.854167	0.825321	0.846154
True	none	chi2	23	RandomForestClassifier	0.99359	0.825321	0.846154
False	std	chi2	16	SVC	0.894231	0.823718	0.814103
False	std	chi2	17	RandomForestClassifier	0.996795	0.823718	0.839744
False	std	chi2	18	RandomForestClassifier	1	0.823718	0.839744
False	std	chi2	22	RandomForestClassifier	0.995192	0.823718	0.826923
False	std	chi2	23	RandomForestClassifier	0.998397	0.823718	0.871795
True	std	chi2	9	SVC	0.897436	0.823718	0.839744
True	std	chi2	12	SVC	0.900641	0.823718	0.865385
True	std	chi2	18	KNeighborsClassifier	0.871795	0.823718	0.814103
True	std	chi2	21	KNeighborsClassifier	0.862179	0.823718	0.852564
True	std	chi2	22	KNeighborsClassifier	0.883013	0.823718	0.820513
False	std	sfs	7	LogisticRegression	0.892628	0.823718	0.846154
False	std	sfs	10	LogisticRegression	0.894231	0.823718	0.820513
False	std	sfs	10	RandomForestClassifier	1	0.823718	0.833333
False	std	sfs	17	RandomForestClassifier	0.998397	0.823718	0.846154
True	std	sfs	1	GaussianNB	0.842949	0.823718	0.839744
True	std	sfs	18	LogisticRegression	0.908654	0.823718	0.852564
True	std	sfs	23	LogisticRegression	0.924679	0.823718	0.858974
True	std	sfs	11	RandomForestClassifier	0.998397	0.823718	0.826923
True	std	sfs	17	RandomForestClassifier	0.964744	0.823718	0.782051
True	none	sfs	1	GaussianNB	0.842949	0.823718	0.839744
True	none	sfs	15	LogisticRegression	0.883013	0.823718	0.820513
True	none	sfs	21	LogisticRegression	0.879808	0.823718	0.833333
True	none	sfs	11	RandomForestClassifier	0.998397	0.823718	0.826923
True	none	sfs	17	RandomForestClassifier	0.964744	0.823718	0.782051
False	none	chi2	17	RandomForestClassifier	0.996795	0.823718	0.839744
False	none	chi2	18	RandomForestClassifier	1	0.823718	0.839744
False	none	chi2	22	RandomForestClassifier	0.995192	0.823718	0.826923
False	none	chi2	23	RandomForestClassifier	0.998397	0.823718	0.871795
False	none	sfs	6	KNeighborsClassifier	0.913462	0.823718	0.801282
False	none	sfs	16	KNeighborsClassifier	0.918269	0.823718	0.820513
False	none	sfs	10	RandomForestClassifier	1	0.823718	0.833333
False	none	sfs	17	RandomForestClassifier	0.998397	0.823718	0.846154
True	none	chi2	18	KNeighborsClassifier	0.871795	0.823718	0.814103
True	none	chi2	21	KNeighborsClassifier	0.862179	0.823718	0.852564
True	none	chi2	22	KNeighborsClassifier	0.883013	0.823718	0.820513
True	none	chi2	12	LogisticRegression	0.860577	0.823718	0.852564
True	none	chi2	25	LogisticRegression	0.852564	0.823718	0.846154
True	none	chi2	6	SVC	0.862179	0.823718	0.833333
False	std	chi2	17	SVC	0.884615	0.822115	0.814103
False	std	chi2	21	KNeighborsClassifier	0.862179	0.822115	0.801282
False	std	chi2	16	RandomForestClassifier	0.995192	0.822115	0.846154
True	std	chi2	6	SVC	0.849359	0.822115	0.833333
True	std	chi2	10	SVC	0.883013	0.822115	0.858974
True	std	chi2	7	KNeighborsClassifier	0.863782	0.822115	0.826923
True	std	chi2	9	KNeighborsClassifier	0.866987	0.822115	0.858974
True	std	chi2	13	KNeighborsClassifier	0.873397	0.822115	0.801282
True	std	chi2	9	LogisticRegression	0.863782	0.822115	0.858974
False	std	sfs	3	SVC	0.899038	0.822115	0.788462
False	std	sfs	5	LogisticRegression	0.88141	0.822115	0.820513
False	std	sfs	8	LogisticRegression	0.895833	0.822115	0.839744
False	std	sfs	6	RandomForestClassifier	1	0.822115	0.833333
True	std	sfs	5	SVC	0.927885	0.822115	0.826923
True	std	sfs	18	GaussianNB	0.891026	0.822115	0.833333
True	std	sfs	21	LogisticRegression	0.916667	0.822115	0.865385
True	std	sfs	22	LogisticRegression	0.915064	0.822115	0.858974
True	std	sfs	24	LogisticRegression	0.929487	0.822115	0.852564
True	none	sfs	1	SVC	0.842949	0.822115	0.826923
True	none	sfs	18	GaussianNB	0.891026	0.822115	0.833333
True	none	sfs	14	LogisticRegression	0.88141	0.822115	0.833333
False	none	chi2	16	RandomForestClassifier	0.995192	0.822115	0.846154
False	none	sfs	13	KNeighborsClassifier	0.916667	0.822115	0.801282
False	none	sfs	17	KNeighborsClassifier	0.915064	0.822115	0.820513
False	none	sfs	12	GaussianNB	0.919872	0.822115	0.820513
False	none	sfs	13	GaussianNB	0.919872	0.822115	0.820513
False	none	sfs	16	GaussianNB	0.923077	0.822115	0.826923
False	none	sfs	17	GaussianNB	0.919872	0.822115	0.846154
False	none	sfs	24	GaussianNB	0.918269	0.822115	0.852564
False	none	sfs	6	RandomForestClassifier	1	0.822115	0.833333
True	none	chi2	7	KNeighborsClassifier	0.863782	0.822115	0.826923
True	none	chi2	9	KNeighborsClassifier	0.866987	0.822115	0.858974
True	none	chi2	13	KNeighborsClassifier	0.873397	0.822115	0.801282
True	none	chi2	24	KNeighborsClassifier	0.875	0.822115	0.839744
True	none	chi2	2	LogisticRegression	0.828526	0.822115	0.820513
True	none	chi2	5	SVC	0.852564	0.822115	0.826923
True	none	chi2	7	SVC	0.878205	0.822115	0.846154
True	none	chi2	8	SVC	0.878205	0.822115	0.846154
True	none	chi2	10	SVC	0.892628	0.822115	0.858974
False	std	chi2	14	SVC	0.876603	0.820513	0.839744
False	std	chi2	19	SVC	0.894231	0.820513	0.833333
False	std	chi2	25	SVC	0.900641	0.820513	0.820513
False	std	chi2	13	RandomForestClassifier	0.988782	0.820513	0.833333
False	std	chi2	19	RandomForestClassifier	0.982372	0.820513	0.833333
False	std	chi2	20	RandomForestClassifier	0.998397	0.820513	0.846154
False	std	chi2	25	RandomForestClassifier	0.998397	0.820513	0.846154
True	std	chi2	11	SVC	0.879808	0.820513	0.833333
True	std	chi2	1	KNeighborsClassifier	0.836538	0.820513	0.826923
True	std	chi2	17	KNeighborsClassifier	0.862179	0.820513	0.833333
True	std	chi2	2	LogisticRegression	0.826923	0.820513	0.826923
True	std	chi2	18	RandomForestClassifier	0.99359	0.820513	0.846154
True	std	chi2	24	RandomForestClassifier	0.996795	0.820513	0.826923
False	std	sfs	12	KNeighborsClassifier	0.9375	0.820513	0.820513
False	std	sfs	9	LogisticRegression	0.894231	0.820513	0.833333
True	std	sfs	19	LogisticRegression	0.911859	0.820513	0.865385
True	std	sfs	9	RandomForestClassifier	0.991987	0.820513	0.833333
True	none	sfs	9	RandomForestClassifier	0.991987	0.820513	0.833333
False	none	chi2	13	RandomForestClassifier	0.988782	0.820513	0.833333
False	none	chi2	19	RandomForestClassifier	0.982372	0.820513	0.833333
False	none	chi2	20	RandomForestClassifier	0.998397	0.820513	0.846154
False	none	chi2	25	RandomForestClassifier	0.998397	0.820513	0.846154
False	none	sfs	11	KNeighborsClassifier	0.913462	0.820513	0.801282
False	none	sfs	18	GaussianNB	0.918269	0.820513	0.852564
True	none	chi2	1	KNeighborsClassifier	0.836538	0.820513	0.826923
True	none	chi2	17	KNeighborsClassifier	0.862179	0.820513	0.833333
True	none	chi2	18	RandomForestClassifier	0.99359	0.820513	0.846154
True	none	chi2	24	RandomForestClassifier	0.996795	0.820513	0.826923
True	none	chi2	4	SVC	0.849359	0.820513	0.820513
False	std	chi2	9	SVC	0.870192	0.81891	0.826923
False	std	chi2	13	SVC	0.875	0.81891	0.833333
False	std	chi2	15	SVC	0.88141	0.81891	0.826923
False	std	chi2	22	KNeighborsClassifier	0.857372	0.81891	0.794872
False	std	chi2	6	LogisticRegression	0.834936	0.81891	0.820513
False	std	chi2	11	RandomForestClassifier	0.982372	0.81891	0.826923
False	std	chi2	21	RandomForestClassifier	0.996795	0.81891	0.820513
True	std	chi2	8	KNeighborsClassifier	0.852564	0.81891	0.852564
True	std	chi2	14	RandomForestClassifier	0.990385	0.81891	0.826923
True	std	chi2	20	RandomForestClassifier	1	0.81891	0.846154
True	std	chi2	21	RandomForestClassifier	0.99359	0.81891	0.833333
True	std	chi2	22	RandomForestClassifier	0.991987	0.81891	0.801282
False	std	none	-1	KNeighborsClassifier	0.879808	0.81891	0.788462
False	std	sfs	6	SVC	0.929487	0.81891	0.814103
False	std	sfs	7	SVC	0.924679	0.81891	0.762821
False	std	sfs	18	KNeighborsClassifier	0.934295	0.81891	0.814103
False	std	sfs	12	GaussianNB	0.919872	0.81891	0.807692
False	std	sfs	6	LogisticRegression	0.887821	0.81891	0.833333
False	std	sfs	12	RandomForestClassifier	1	0.81891	0.814103
True	std	sfs	19	GaussianNB	0.894231	0.81891	0.826923
True	std	sfs	21	GaussianNB	0.895833	0.81891	0.839744
True	std	sfs	22	GaussianNB	0.897436	0.81891	0.846154
True	std	sfs	25	GaussianNB	0.902244	0.81891	0.858974
True	std	sfs	20	LogisticRegression	0.915064	0.81891	0.865385
True	std	sfs	6	RandomForestClassifier	0.995192	0.81891	0.833333
True	none	sfs	5	SVC	0.924679	0.81891	0.852564
True	none	sfs	19	GaussianNB	0.894231	0.81891	0.826923
True	none	sfs	21	GaussianNB	0.895833	0.81891	0.839744
True	none	sfs	22	GaussianNB	0.897436	0.81891	0.846154
True	none	sfs	25	GaussianNB	0.902244	0.81891	0.858974
True	none	sfs	12	LogisticRegression	0.883013	0.81891	0.833333
True	none	sfs	13	LogisticRegression	0.883013	0.81891	0.833333
True	none	sfs	6	RandomForestClassifier	0.995192	0.81891	0.833333
False	none	chi2	11	RandomForestClassifier	0.982372	0.81891	0.826923
False	none	chi2	21	RandomForestClassifier	0.996795	0.81891	0.820513
False	none	sfs	2	KNeighborsClassifier	0.88141	0.81891	0.794872
False	none	sfs	10	KNeighborsClassifier	0.900641	0.81891	0.814103
False	none	sfs	19	KNeighborsClassifier	0.918269	0.81891	0.801282
False	none	sfs	12	RandomForestClassifier	1	0.81891	0.814103
True	none	chi2	8	KNeighborsClassifier	0.852564	0.81891	0.852564
True	none	chi2	16	KNeighborsClassifier	0.855769	0.81891	0.839744
True	none	chi2	14	RandomForestClassifier	0.990385	0.81891	0.826923
True	none	chi2	20	RandomForestClassifier	1	0.81891	0.846154
True	none	chi2	21	RandomForestClassifier	0.99359	0.81891	0.833333
True	none	chi2	22	RandomForestClassifier	0.991987	0.81891	0.801282
False	std	chi2	18	SVC	0.887821	0.817308	0.820513
True	std	chi2	5	SVC	0.846154	0.817308	0.820513
True	std	chi2	7	SVC	0.855769	0.817308	0.852564
True	std	chi2	16	KNeighborsClassifier	0.857372	0.817308	0.833333
True	std	chi2	7	LogisticRegression	0.850962	0.817308	0.833333
False	std	sfs	13	GaussianNB	0.919872	0.817308	0.801282
False	std	sfs	14	GaussianNB	0.921474	0.817308	0.833333
False	std	sfs	18	GaussianNB	0.923077	0.817308	0.852564
False	std	sfs	21	GaussianNB	0.918269	0.817308	0.839744
False	std	sfs	22	GaussianNB	0.915064	0.817308	0.852564
False	std	sfs	8	RandomForestClassifier	1	0.817308	0.826923
False	std	sfs	9	RandomForestClassifier	1	0.817308	0.826923
True	std	sfs	17	GaussianNB	0.889423	0.817308	0.858974
True	std	sfs	23	GaussianNB	0.897436	0.817308	0.852564
True	std	sfs	12	LogisticRegression	0.895833	0.817308	0.807692
True	none	sfs	6	KNeighborsClassifier	0.918269	0.817308	0.884615
True	none	sfs	17	GaussianNB	0.889423	0.817308	0.858974
True	none	sfs	23	GaussianNB	0.897436	0.817308	0.852564
True	none	sfs	11	LogisticRegression	0.883013	0.817308	0.826923
False	none	sfs	22	GaussianNB	0.918269	0.817308	0.852564
False	none	sfs	8	RandomForestClassifier	1	0.817308	0.826923
False	none	sfs	9	RandomForestClassifier	1	0.817308	0.826923
False	std	chi2	12	SVC	0.878205	0.815705	0.839744
False	std	chi2	20	SVC	0.894231	0.815705	0.807692
False	std	chi2	20	KNeighborsClassifier	0.865385	0.815705	0.826923
False	std	chi2	8	RandomForestClassifier	0.99359	0.815705	0.820513
False	std	chi2	9	RandomForestClassifier	0.99359	0.815705	0.820513
True	std	chi2	3	SVC	0.836538	0.815705	0.839744
True	std	chi2	4	SVC	0.841346	0.815705	0.820513
True	std	chi2	8	SVC	0.858974	0.815705	0.846154
True	std	chi2	12	KNeighborsClassifier	0.858974	0.815705	0.846154
True	std	chi2	14	KNeighborsClassifier	0.865385	0.815705	0.839744
True	std	chi2	15	RandomForestClassifier	0.995192	0.815705	0.865385
True	std	chi2	16	RandomForestClassifier	0.995192	0.815705	0.839744
True	std	chi2	19	RandomForestClassifier	0.99359	0.815705	0.846154
False	std	sfs	15	KNeighborsClassifier	0.935897	0.815705	0.826923
False	std	sfs	16	KNeighborsClassifier	0.934295	0.815705	0.814103
False	std	sfs	2	GaussianNB	0.86859	0.815705	0.826923
False	std	sfs	15	GaussianNB	0.923077	0.815705	0.846154
False	std	sfs	20	GaussianNB	0.918269	0.815705	0.858974
True	std	sfs	15	GaussianNB	0.894231	0.815705	0.833333
True	std	sfs	16	GaussianNB	0.894231	0.815705	0.833333
True	std	sfs	9	LogisticRegression	0.886218	0.815705	0.846154
True	std	sfs	16	LogisticRegression	0.903846	0.815705	0.833333
True	std	sfs	17	LogisticRegression	0.905449	0.815705	0.839744
True	std	sfs	8	RandomForestClassifier	1	0.815705	0.826923
True	none	sfs	22	KNeighborsClassifier	0.945513	0.815705	0.833333
True	none	sfs	15	GaussianNB	0.894231	0.815705	0.833333
True	none	sfs	16	GaussianNB	0.894231	0.815705	0.833333
True	none	sfs	6	LogisticRegression	0.873397	0.815705	0.826923
True	none	sfs	8	RandomForestClassifier	1	0.815705	0.826923
False	none	chi2	8	RandomForestClassifier	0.99359	0.815705	0.820513
False	none	chi2	9	RandomForestClassifier	0.99359	0.815705	0.820513
False	none	sfs	9	KNeighborsClassifier	0.911859	0.815705	0.807692
False	none	sfs	2	GaussianNB	0.86859	0.815705	0.826923
False	none	sfs	25	GaussianNB	0.918269	0.815705	0.852564
True	none	chi2	12	KNeighborsClassifier	0.860577	0.815705	0.846154
True	none	chi2	14	KNeighborsClassifier	0.865385	0.815705	0.839744
True	none	chi2	15	RandomForestClassifier	0.995192	0.815705	0.865385
True	none	chi2	16	RandomForestClassifier	0.995192	0.815705	0.839744
True	none	chi2	19	RandomForestClassifier	0.99359	0.815705	0.846154
False	std	chi2	7	SVC	0.858974	0.814103	0.846154
False	std	chi2	10	SVC	0.865385	0.814103	0.839744
False	std	chi2	14	KNeighborsClassifier	0.858974	0.814103	0.782051
False	std	chi2	15	RandomForestClassifier	0.996795	0.814103	0.852564
False	std	chi2	24	RandomForestClassifier	0.998397	0.814103	0.826923
True	std	chi2	10	KNeighborsClassifier	0.852564	0.814103	0.858974
False	std	sfs	1	SVC	0.833333	0.814103	0.833333
False	std	sfs	19	KNeighborsClassifier	0.9375	0.814103	0.839744
True	std	sfs	6	KNeighborsClassifier	0.911859	0.814103	0.871795
True	std	sfs	22	KNeighborsClassifier	0.953526	0.814103	0.839744
True	std	sfs	11	GaussianNB	0.889423	0.814103	0.807692
True	std	sfs	14	GaussianNB	0.886218	0.814103	0.826923
True	std	sfs	1	LogisticRegression	0.839744	0.814103	0.839744
True	std	sfs	4	RandomForestClassifier	0.995192	0.814103	0.801282
True	std	sfs	12	RandomForestClassifier	1	0.814103	0.814103
True	none	sfs	17	KNeighborsClassifier	0.950321	0.814103	0.807692
True	none	sfs	18	KNeighborsClassifier	0.947115	0.814103	0.814103
True	none	sfs	24	KNeighborsClassifier	0.93109	0.814103	0.826923
True	none	sfs	11	GaussianNB	0.889423	0.814103	0.807692
True	none	sfs	14	GaussianNB	0.886218	0.814103	0.826923
True	none	sfs	5	LogisticRegression	0.875	0.814103	0.833333
True	none	sfs	7	LogisticRegression	0.873397	0.814103	0.820513
True	none	sfs	4	RandomForestClassifier	0.995192	0.814103	0.801282
True	none	sfs	12	RandomForestClassifier	1	0.814103	0.814103
False	none	chi2	15	RandomForestClassifier	0.996795	0.814103	0.852564
False	none	chi2	24	RandomForestClassifier	0.998397	0.814103	0.826923
True	none	chi2	10	KNeighborsClassifier	0.852564	0.814103	0.858974
True	none	chi2	2	SVC	0.839744	0.814103	0.814103
True	none	chi2	3	SVC	0.842949	0.814103	0.846154
False	std	chi2	11	SVC	0.86859	0.8125	0.820513
False	std	chi2	22	SVC	0.903846	0.8125	0.826923
False	std	chi2	5	LogisticRegression	0.825321	0.8125	0.833333
False	std	chi2	7	RandomForestClassifier	0.967949	0.8125	0.794872
False	std	chi2	10	RandomForestClassifier	0.996795	0.8125	0.839744
False	std	chi2	12	RandomForestClassifier	0.995192	0.8125	0.814103
True	std	chi2	2	SVC	0.838141	0.8125	0.814103
True	std	chi2	2	GaussianNB	0.826923	0.8125	0.833333
True	std	chi2	9	GaussianNB	0.836538	0.8125	0.833333
True	std	chi2	8	LogisticRegression	0.849359	0.8125	0.826923
True	std	chi2	8	RandomForestClassifier	0.982372	0.8125	0.852564
False	std	sfs	6	KNeighborsClassifier	0.905449	0.8125	0.730769
False	std	sfs	11	KNeighborsClassifier	0.926282	0.8125	0.769231
False	std	sfs	16	GaussianNB	0.919872	0.8125	0.846154
False	std	sfs	1	LogisticRegression	0.823718	0.8125	0.833333
False	std	sfs	4	LogisticRegression	0.878205	0.8125	0.826923
True	std	sfs	23	KNeighborsClassifier	0.950321	0.8125	0.846154
True	std	sfs	24	GaussianNB	0.897436	0.8125	0.858974
True	std	sfs	13	LogisticRegression	0.897436	0.8125	0.826923
True	std	sfs	15	LogisticRegression	0.900641	0.8125	0.833333
True	std	sfs	7	RandomForestClassifier	0.99359	0.8125	0.839744
True	none	sfs	5	KNeighborsClassifier	0.915064	0.8125	0.871795
True	none	sfs	24	GaussianNB	0.897436	0.8125	0.858974
True	none	sfs	7	RandomForestClassifier	0.99359	0.8125	0.839744
False	none	chi2	7	RandomForestClassifier	0.967949	0.8125	0.794872
False	none	chi2	10	RandomForestClassifier	0.996795	0.8125	0.839744
False	none	chi2	12	RandomForestClassifier	0.995192	0.8125	0.814103
False	none	sfs	5	KNeighborsClassifier	0.891026	0.8125	0.833333
False	none	sfs	21	KNeighborsClassifier	0.899038	0.8125	0.801282
True	none	chi2	2	GaussianNB	0.826923	0.8125	0.833333
True	none	chi2	9	GaussianNB	0.836538	0.8125	0.833333
True	none	chi2	7	LogisticRegression	0.844551	0.8125	0.833333
True	none	chi2	8	RandomForestClassifier	0.982372	0.8125	0.852564
False	std	chi2	21	SVC	0.891026	0.810897	0.814103
False	std	chi2	11	KNeighborsClassifier	0.857372	0.810897	0.794872
False	std	chi2	17	KNeighborsClassifier	0.866987	0.810897	0.788462
False	std	chi2	24	KNeighborsClassifier	0.863782	0.810897	0.782051
False	std	chi2	25	KNeighborsClassifier	0.862179	0.810897	0.801282
True	std	chi2	5	KNeighborsClassifier	0.865385	0.810897	0.807692
True	std	chi2	10	GaussianNB	0.833333	0.810897	0.839744
True	std	chi2	10	RandomForestClassifier	1	0.810897	0.858974
True	std	chi2	11	RandomForestClassifier	0.991987	0.810897	0.858974
False	std	sfs	2	SVC	0.884615	0.810897	0.833333
False	std	sfs	14	KNeighborsClassifier	0.935897	0.810897	0.814103
False	std	sfs	7	RandomForestClassifier	1	0.810897	0.839744
True	std	sfs	5	KNeighborsClassifier	0.915064	0.810897	0.871795
True	std	sfs	18	KNeighborsClassifier	0.950321	0.810897	0.833333
True	std	sfs	8	LogisticRegression	0.883013	0.810897	0.839744
True	std	sfs	10	LogisticRegression	0.892628	0.810897	0.833333
True	std	sfs	11	LogisticRegression	0.886218	0.810897	0.852564
True	std	sfs	14	LogisticRegression	0.897436	0.810897	0.833333
True	none	sfs	19	KNeighborsClassifier	0.94391	0.810897	0.826923
True	none	sfs	21	KNeighborsClassifier	0.934295	0.810897	0.814103
True	none	sfs	23	KNeighborsClassifier	0.93109	0.810897	0.807692
True	none	sfs	10	LogisticRegression	0.879808	0.810897	0.846154
False	none	sfs	7	RandomForestClassifier	1	0.810897	0.839744
True	none	chi2	5	KNeighborsClassifier	0.865385	0.810897	0.807692
True	none	chi2	10	GaussianNB	0.833333	0.810897	0.839744
True	none	chi2	10	RandomForestClassifier	1	0.810897	0.858974
True	none	chi2	11	RandomForestClassifier	0.991987	0.810897	0.858974
False	std	chi2	8	SVC	0.863782	0.809295	0.820513
False	std	chi2	23	SVC	0.891026	0.809295	0.826923
False	std	chi2	24	SVC	0.878205	0.809295	0.794872
False	std	chi2	13	KNeighborsClassifier	0.858974	0.809295	0.794872
False	std	chi2	15	KNeighborsClassifier	0.876603	0.809295	0.807692
True	std	chi2	20	GaussianNB	0.822115	0.809295	0.814103
True	std	chi2	6	LogisticRegression	0.838141	0.809295	0.839744
True	std	chi2	7	RandomForestClassifier	0.995192	0.809295	0.826923
True	std	chi2	9	RandomForestClassifier	0.995192	0.809295	0.833333
True	std	chi2	13	RandomForestClassifier	0.998397	0.809295	0.846154
True	std	chi2	17	RandomForestClassifier	0.995192	0.809295	0.833333
False	std	sfs	17	GaussianNB	0.921474	0.809295	0.846154
False	std	sfs	19	GaussianNB	0.924679	0.809295	0.858974
False	std	sfs	4	RandomForestClassifier	0.983974	0.809295	0.782051
True	std	sfs	12	KNeighborsClassifier	0.94391	0.809295	0.820513
True	std	sfs	13	KNeighborsClassifier	0.947115	0.809295	0.807692
True	std	sfs	17	KNeighborsClassifier	0.950321	0.809295	0.820513
True	std	sfs	4	GaussianNB	0.879808	0.809295	0.839744
True	std	sfs	6	GaussianNB	0.879808	0.809295	0.852564
True	none	sfs	4	GaussianNB	0.879808	0.809295	0.839744
True	none	sfs	6	GaussianNB	0.879808	0.809295	0.852564
True	none	sfs	2	LogisticRegression	0.866987	0.809295	0.833333
False	none	sfs	20	KNeighborsClassifier	0.907051	0.809295	0.801282
False	none	sfs	4	RandomForestClassifier	0.983974	0.809295	0.782051
True	none	chi2	20	GaussianNB	0.822115	0.809295	0.814103
True	none	chi2	8	LogisticRegression	0.846154	0.809295	0.839744
True	none	chi2	7	RandomForestClassifier	0.995192	0.809295	0.826923
True	none	chi2	9	RandomForestClassifier	0.995192	0.809295	0.833333
True	none	chi2	13	RandomForestClassifier	0.998397	0.809295	0.846154
True	none	chi2	17	RandomForestClassifier	0.995192	0.809295	0.833333
False	std	chi2	10	KNeighborsClassifier	0.858974	0.807692	0.820513
False	std	chi2	18	KNeighborsClassifier	0.866987	0.807692	0.820513
True	std	chi2	11	KNeighborsClassifier	0.871795	0.807692	0.826923
True	std	chi2	19	GaussianNB	0.823718	0.807692	0.814103
True	std	chi2	22	GaussianNB	0.825321	0.807692	0.807692
True	std	chi2	3	LogisticRegression	0.826923	0.807692	0.826923
True	std	chi2	4	LogisticRegression	0.830128	0.807692	0.839744
True	std	chi2	5	LogisticRegression	0.830128	0.807692	0.826923
True	std	chi2	12	RandomForestClassifier	0.99359	0.807692	0.846154
False	std	sfs	1	KNeighborsClassifier	0.836538	0.807692	0.737179
False	std	sfs	9	KNeighborsClassifier	0.932692	0.807692	0.769231
False	std	sfs	17	KNeighborsClassifier	0.932692	0.807692	0.807692
False	std	sfs	2	LogisticRegression	0.857372	0.807692	0.814103
False	std	sfs	3	LogisticRegression	0.871795	0.807692	0.820513
True	std	sfs	4	KNeighborsClassifier	0.910256	0.807692	0.820513
True	std	sfs	21	KNeighborsClassifier	0.945513	0.807692	0.826923
True	std	sfs	24	KNeighborsClassifier	0.950321	0.807692	0.858974
True	std	sfs	13	GaussianNB	0.886218	0.807692	0.826923
True	none	sfs	4	KNeighborsClassifier	0.908654	0.807692	0.839744
True	none	sfs	8	KNeighborsClassifier	0.93109	0.807692	0.826923
True	none	sfs	16	KNeighborsClassifier	0.948718	0.807692	0.814103
True	none	sfs	13	GaussianNB	0.886218	0.807692	0.826923
True	none	sfs	4	LogisticRegression	0.871795	0.807692	0.826923
True	none	sfs	9	LogisticRegression	0.875	0.807692	0.846154
False	none	sfs	1	KNeighborsClassifier	0.836538	0.807692	0.737179
True	none	chi2	11	KNeighborsClassifier	0.871795	0.807692	0.826923
True	none	chi2	19	GaussianNB	0.823718	0.807692	0.814103
True	none	chi2	22	GaussianNB	0.825321	0.807692	0.807692
True	none	chi2	3	LogisticRegression	0.820513	0.807692	0.820513
True	none	chi2	12	RandomForestClassifier	0.99359	0.807692	0.846154
False	std	chi2	23	KNeighborsClassifier	0.858974	0.80609	0.801282
False	std	chi2	6	RandomForestClassifier	0.996795	0.80609	0.852564
True	std	chi2	11	GaussianNB	0.828526	0.80609	0.820513
True	std	chi2	21	GaussianNB	0.825321	0.80609	0.807692
True	std	chi2	23	GaussianNB	0.822115	0.80609	0.814103
True	std	chi2	25	GaussianNB	0.823718	0.80609	0.807692
True	std	chi2	3	RandomForestClassifier	1	0.80609	0.814103
True	std	sfs	8	KNeighborsClassifier	0.926282	0.80609	0.814103
True	std	sfs	14	KNeighborsClassifier	0.948718	0.80609	0.858974
True	std	sfs	7	LogisticRegression	0.875	0.80609	0.833333
True	none	sfs	13	KNeighborsClassifier	0.947115	0.80609	0.814103
True	none	sfs	3	LogisticRegression	0.873397	0.80609	0.826923
True	none	sfs	8	LogisticRegression	0.875	0.80609	0.852564
False	none	chi2	6	RandomForestClassifier	0.996795	0.80609	0.852564
True	none	chi2	11	GaussianNB	0.828526	0.80609	0.820513
True	none	chi2	21	GaussianNB	0.825321	0.80609	0.807692
True	none	chi2	23	GaussianNB	0.822115	0.80609	0.814103
True	none	chi2	25	GaussianNB	0.823718	0.80609	0.807692
True	none	chi2	3	RandomForestClassifier	1	0.80609	0.814103
False	std	chi2	6	SVC	0.852564	0.804487	0.852564
False	std	chi2	8	KNeighborsClassifier	0.849359	0.804487	0.839744
False	std	chi2	16	KNeighborsClassifier	0.86859	0.804487	0.801282
False	std	chi2	19	KNeighborsClassifier	0.865385	0.804487	0.814103
True	std	chi2	2	KNeighborsClassifier	0.838141	0.804487	0.788462
True	std	chi2	4	KNeighborsClassifier	0.841346	0.804487	0.826923
True	std	chi2	8	GaussianNB	0.822115	0.804487	0.820513
True	std	chi2	24	GaussianNB	0.822115	0.804487	0.807692
False	std	sfs	2	KNeighborsClassifier	0.895833	0.804487	0.769231
False	std	sfs	7	KNeighborsClassifier	0.918269	0.804487	0.762821
True	std	sfs	3	KNeighborsClassifier	0.902244	0.804487	0.846154
True	std	sfs	16	KNeighborsClassifier	0.947115	0.804487	0.814103
True	std	sfs	2	GaussianNB	0.862179	0.804487	0.839744
True	std	sfs	3	GaussianNB	0.86859	0.804487	0.846154
True	none	sfs	3	KNeighborsClassifier	0.902244	0.804487	0.826923
True	none	sfs	7	KNeighborsClassifier	0.923077	0.804487	0.871795
True	none	sfs	12	KNeighborsClassifier	0.955128	0.804487	0.820513
True	none	sfs	14	KNeighborsClassifier	0.945513	0.804487	0.839744
True	none	sfs	20	KNeighborsClassifier	0.942308	0.804487	0.826923
True	none	sfs	25	KNeighborsClassifier	0.934295	0.804487	0.846154
True	none	sfs	2	GaussianNB	0.862179	0.804487	0.839744
True	none	sfs	3	GaussianNB	0.86859	0.804487	0.846154
False	none	sfs	23	KNeighborsClassifier	0.902244	0.804487	0.762821
True	none	chi2	2	KNeighborsClassifier	0.838141	0.804487	0.788462
True	none	chi2	4	KNeighborsClassifier	0.841346	0.804487	0.826923
True	none	chi2	8	GaussianNB	0.822115	0.804487	0.820513
True	none	chi2	24	GaussianNB	0.822115	0.804487	0.807692
False	std	chi2	5	SVC	0.844551	0.802885	0.820513
False	std	chi2	5	RandomForestClassifier	0.99359	0.802885	0.826923
True	std	chi2	7	GaussianNB	0.830128	0.802885	0.833333
True	std	chi2	13	GaussianNB	0.834936	0.802885	0.826923
True	std	chi2	16	GaussianNB	0.826923	0.802885	0.807692
True	std	chi2	5	RandomForestClassifier	0.990385	0.802885	0.814103
True	std	sfs	7	KNeighborsClassifier	0.923077	0.802885	0.865385
True	std	sfs	9	KNeighborsClassifier	0.93109	0.802885	0.833333
True	std	sfs	15	KNeighborsClassifier	0.945513	0.802885	0.833333
True	std	sfs	5	GaussianNB	0.88141	0.802885	0.839744
True	std	sfs	7	GaussianNB	0.879808	0.802885	0.846154
True	std	sfs	12	GaussianNB	0.889423	0.802885	0.814103
True	std	sfs	6	LogisticRegression	0.88141	0.802885	0.807692
True	none	sfs	5	GaussianNB	0.88141	0.802885	0.839744
True	none	sfs	7	GaussianNB	0.879808	0.802885	0.846154
True	none	sfs	12	GaussianNB	0.889423	0.802885	0.814103
False	none	chi2	5	RandomForestClassifier	0.99359	0.802885	0.826923
False	none	sfs	22	KNeighborsClassifier	0.897436	0.802885	0.801282
True	none	chi2	7	GaussianNB	0.830128	0.802885	0.833333
True	none	chi2	13	GaussianNB	0.834936	0.802885	0.826923
True	none	chi2	16	GaussianNB	0.826923	0.802885	0.807692
True	none	chi2	5	RandomForestClassifier	0.990385	0.802885	0.814103
False	std	chi2	11	GaussianNB	0.822115	0.801282	0.807692
False	std	chi2	12	GaussianNB	0.825321	0.801282	0.820513
True	std	chi2	6	KNeighborsClassifier	0.857372	0.801282	0.826923
True	std	chi2	15	GaussianNB	0.828526	0.801282	0.820513
True	std	chi2	17	GaussianNB	0.823718	0.801282	0.807692
True	std	chi2	18	GaussianNB	0.822115	0.801282	0.801282
True	std	chi2	6	RandomForestClassifier	0.996795	0.801282	0.839744
True	none	none	-1	KNeighborsClassifier	0.863782	0.801282	0.801282
True	std	none	-1	KNeighborsClassifier	0.863782	0.801282	0.801282
True	std	sfs	19	KNeighborsClassifier	0.953526	0.801282	0.820513
True	std	sfs	25	KNeighborsClassifier	0.947115	0.801282	0.833333
True	std	sfs	4	LogisticRegression	0.871795	0.801282	0.833333
True	none	sfs	10	KNeighborsClassifier	0.921474	0.801282	0.833333
True	none	sfs	15	KNeighborsClassifier	0.94391	0.801282	0.820513
False	none	chi2	11	GaussianNB	0.822115	0.801282	0.807692
True	none	chi2	6	KNeighborsClassifier	0.857372	0.801282	0.826923
True	none	chi2	15	GaussianNB	0.828526	0.801282	0.820513
True	none	chi2	17	GaussianNB	0.823718	0.801282	0.807692
True	none	chi2	18	GaussianNB	0.822115	0.801282	0.801282
True	none	chi2	4	LogisticRegression	0.815705	0.801282	0.820513
True	none	chi2	5	LogisticRegression	0.801282	0.801282	0.814103
True	none	chi2	6	RandomForestClassifier	0.996795	0.801282	0.839744
False	std	chi2	7	KNeighborsClassifier	0.865385	0.799679	0.814103
False	std	chi2	12	KNeighborsClassifier	0.866987	0.799679	0.826923
False	std	chi2	13	GaussianNB	0.81891	0.799679	0.820513
False	std	chi2	14	GaussianNB	0.817308	0.799679	0.814103
False	std	chi2	15	GaussianNB	0.80609	0.799679	0.814103
True	std	chi2	6	GaussianNB	0.81891	0.799679	0.820513
True	std	chi2	12	GaussianNB	0.838141	0.799679	0.839744
True	std	chi2	14	GaussianNB	0.830128	0.799679	0.814103
True	std	chi2	4	RandomForestClassifier	0.995192	0.799679	0.839744
False	std	sfs	5	KNeighborsClassifier	0.902244	0.799679	0.775641
False	std	sfs	10	KNeighborsClassifier	0.927885	0.799679	0.794872
True	std	sfs	10	KNeighborsClassifier	0.934295	0.799679	0.846154
True	std	sfs	20	KNeighborsClassifier	0.953526	0.799679	0.794872
True	std	sfs	5	RandomForestClassifier	0.982372	0.799679	0.807692
True	none	sfs	5	RandomForestClassifier	0.982372	0.799679	0.807692
False	none	chi2	12	GaussianNB	0.825321	0.799679	0.820513
False	none	chi2	13	GaussianNB	0.81891	0.799679	0.820513
False	none	chi2	14	GaussianNB	0.815705	0.799679	0.814103
True	none	chi2	6	GaussianNB	0.81891	0.799679	0.820513
True	none	chi2	12	GaussianNB	0.838141	0.799679	0.839744
True	none	chi2	14	GaussianNB	0.830128	0.799679	0.814103
True	none	chi2	4	RandomForestClassifier	0.995192	0.799679	0.839744
False	std	chi2	6	KNeighborsClassifier	0.849359	0.798077	0.814103
False	std	chi2	9	KNeighborsClassifier	0.857372	0.798077	0.846154
False	std	chi2	4	LogisticRegression	0.809295	0.798077	0.826923
True	std	chi2	2	RandomForestClassifier	0.99359	0.798077	0.826923
False	std	sfs	5	RandomForestClassifier	0.964744	0.798077	0.769231
True	std	sfs	1	KNeighborsClassifier	0.836538	0.798077	0.826923
True	std	sfs	2	KNeighborsClassifier	0.883013	0.798077	0.833333
True	std	sfs	8	GaussianNB	0.883013	0.798077	0.826923
True	std	sfs	5	LogisticRegression	0.871795	0.798077	0.826923
True	none	sfs	1	KNeighborsClassifier	0.836538	0.798077	0.826923
True	none	sfs	2	KNeighborsClassifier	0.88141	0.798077	0.833333
True	none	sfs	8	GaussianNB	0.883013	0.798077	0.826923
False	none	chi2	15	GaussianNB	0.807692	0.798077	0.814103
False	none	sfs	24	KNeighborsClassifier	0.897436	0.798077	0.788462
False	none	sfs	5	RandomForestClassifier	0.964744	0.798077	0.769231
True	none	chi2	2	RandomForestClassifier	0.99359	0.798077	0.826923
False	std	chi2	3	LogisticRegression	0.804487	0.796474	0.788462
False	std	sfs	3	KNeighborsClassifier	0.907051	0.796474	0.698718
True	std	sfs	11	KNeighborsClassifier	0.924679	0.796474	0.833333
True	std	sfs	9	GaussianNB	0.889423	0.796474	0.826923
True	std	sfs	10	GaussianNB	0.889423	0.796474	0.814103
True	std	sfs	2	LogisticRegression	0.863782	0.796474	0.833333
True	none	sfs	9	GaussianNB	0.889423	0.796474	0.826923
True	none	sfs	10	GaussianNB	0.889423	0.796474	0.814103
False	none	none	-1	LogisticRegression	0.876603	0.796474	0.788462
True	none	chi2	6	LogisticRegression	0.823718	0.796474	0.826923
False	std	chi2	16	GaussianNB	0.804487	0.794872	0.794872
False	std	chi2	17	GaussianNB	0.802885	0.794872	0.788462
True	std	chi2	3	KNeighborsClassifier	0.855769	0.794872	0.801282
True	std	chi2	3	GaussianNB	0.828526	0.794872	0.814103
True	none	none	-1	GaussianNB	0.820513	0.794872	0.807692
True	std	none	-1	GaussianNB	0.820513	0.794872	0.807692
False	std	sfs	4	KNeighborsClassifier	0.902244	0.794872	0.730769
True	std	sfs	3	LogisticRegression	0.870192	0.794872	0.820513
False	none	chi2	16	GaussianNB	0.804487	0.794872	0.794872
False	none	chi2	17	GaussianNB	0.802885	0.794872	0.788462
True	none	chi2	3	KNeighborsClassifier	0.846154	0.794872	0.794872
True	none	chi2	3	GaussianNB	0.828526	0.794872	0.814103
False	std	chi2	7	GaussianNB	0.8125	0.793269	0.801282
False	std	chi2	10	GaussianNB	0.81891	0.793269	0.814103
False	std	none	-1	GaussianNB	0.820513	0.793269	0.807692
True	none	sfs	9	KNeighborsClassifier	0.926282	0.793269	0.814103
False	none	chi2	7	GaussianNB	0.8125	0.793269	0.801282
False	std	chi2	8	GaussianNB	0.81891	0.791667	0.807692
False	std	chi2	9	GaussianNB	0.822115	0.791667	0.807692
False	std	chi2	18	GaussianNB	0.804487	0.791667	0.788462
True	std	chi2	4	GaussianNB	0.807692	0.791667	0.807692
True	std	chi2	5	GaussianNB	0.799679	0.791667	0.801282
False	none	chi2	8	GaussianNB	0.81891	0.791667	0.807692
False	none	chi2	9	GaussianNB	0.822115	0.791667	0.807692
False	none	chi2	18	GaussianNB	0.802885	0.791667	0.788462
True	none	chi2	4	GaussianNB	0.807692	0.791667	0.807692
True	none	chi2	5	GaussianNB	0.799679	0.791667	0.801282
False	none	chi2	10	GaussianNB	0.81891	0.790064	0.814103
False	std	chi2	5	KNeighborsClassifier	0.842949	0.788462	0.801282
False	std	chi2	19	GaussianNB	0.802885	0.788462	0.782051
False	std	chi2	4	RandomForestClassifier	0.99359	0.788462	0.788462
False	std	sfs	8	KNeighborsClassifier	0.921474	0.788462	0.794872
False	none	chi2	4	RandomForestClassifier	0.99359	0.788462	0.788462
False	std	chi2	4	SVC	0.828526	0.786859	0.807692
False	std	chi2	4	KNeighborsClassifier	0.858974	0.786859	0.788462
False	std	chi2	6	GaussianNB	0.798077	0.786859	0.801282
False	std	chi2	20	GaussianNB	0.799679	0.786859	0.782051
True	none	sfs	11	KNeighborsClassifier	0.93109	0.786859	0.814103
False	none	chi2	6	GaussianNB	0.798077	0.786859	0.801282
False	none	chi2	19	GaussianNB	0.802885	0.786859	0.782051
False	none	chi2	20	GaussianNB	0.801282	0.785256	0.782051
False	none	sfs	25	KNeighborsClassifier	0.892628	0.785256	0.788462
False	std	chi2	3	SVC	0.822115	0.783654	0.801282
False	none	chi2	22	GaussianNB	0.799679	0.783654	0.782051
False	std	chi2	2	KNeighborsClassifier	0.854167	0.782051	0.788462
False	std	chi2	22	GaussianNB	0.796474	0.782051	0.782051
False	std	chi2	2	LogisticRegression	0.802885	0.782051	0.782051
False	std	chi2	3	RandomForestClassifier	0.998397	0.782051	0.782051
False	std	sfs	1	GaussianNB	0.807692	0.782051	0.762821
False	none	chi2	21	GaussianNB	0.798077	0.782051	0.788462
False	none	chi2	25	GaussianNB	0.802885	0.782051	0.775641
False	none	chi2	3	RandomForestClassifier	0.998397	0.782051	0.782051
False	none	sfs	1	GaussianNB	0.807692	0.782051	0.762821
False	std	chi2	3	KNeighborsClassifier	0.847756	0.780449	0.775641
False	std	chi2	4	GaussianNB	0.796474	0.780449	0.794872
False	std	chi2	21	GaussianNB	0.798077	0.780449	0.788462
False	std	chi2	23	GaussianNB	0.796474	0.780449	0.782051
False	none	chi2	4	GaussianNB	0.796474	0.780449	0.794872
False	none	chi2	23	GaussianNB	0.796474	0.780449	0.782051
False	none	chi2	24	GaussianNB	0.796474	0.780449	0.782051
False	none	none	-1	GaussianNB	0.81891	0.780449	0.794872
False	std	chi2	3	GaussianNB	0.786859	0.778846	0.788462
False	std	chi2	24	GaussianNB	0.794872	0.778846	0.782051
False	std	chi2	25	GaussianNB	0.799679	0.778846	0.775641
False	none	chi2	3	GaussianNB	0.786859	0.778846	0.788462
False	std	chi2	5	GaussianNB	0.794872	0.777244	0.801282
False	none	chi2	5	GaussianNB	0.794872	0.777244	0.801282
False	std	chi2	2	SVC	0.830128	0.775641	0.794872
True	std	sfs	3	RandomForestClassifier	0.987179	0.775641	0.75
True	none	sfs	3	RandomForestClassifier	0.987179	0.775641	0.75
False	none	chi2	2	KNeighborsClassifier	0.842949	0.775641	0.794872
False	std	chi2	2	RandomForestClassifier	0.99359	0.774038	0.794872
False	none	chi2	2	RandomForestClassifier	0.99359	0.774038	0.794872
False	none	sfs	24	LogisticRegression	0.870192	0.774038	0.788462
False	none	sfs	25	LogisticRegression	0.873397	0.774038	0.801282
False	none	sfs	21	LogisticRegression	0.873397	0.770833	0.814103
False	none	sfs	12	LogisticRegression	0.863782	0.769231	0.794872
False	std	chi2	2	GaussianNB	0.794872	0.767628	0.782051
False	none	chi2	2	GaussianNB	0.794872	0.767628	0.782051
False	none	sfs	10	LogisticRegression	0.842949	0.767628	0.782051
False	none	sfs	11	LogisticRegression	0.852564	0.767628	0.775641
False	none	sfs	20	LogisticRegression	0.876603	0.767628	0.820513
False	none	sfs	23	LogisticRegression	0.870192	0.767628	0.807692
False	std	sfs	25	DecisionTreeClassifier	1	0.766026	0.724359
True	std	sfs	21	DecisionTreeClassifier	1	0.766026	0.74359
True	none	sfs	21	DecisionTreeClassifier	1	0.766026	0.74359
False	none	sfs	25	DecisionTreeClassifier	1	0.766026	0.724359
False	none	sfs	9	LogisticRegression	0.850962	0.766026	0.801282
False	none	sfs	14	LogisticRegression	0.855769	0.766026	0.801282
False	std	sfs	21	DecisionTreeClassifier	1	0.764423	0.74359
False	none	sfs	21	DecisionTreeClassifier	1	0.764423	0.74359
False	none	sfs	15	LogisticRegression	0.860577	0.764423	0.794872
False	none	sfs	22	LogisticRegression	0.870192	0.764423	0.807692
False	std	chi2	1	KNeighborsClassifier	0.828526	0.762821	0.775641
False	std	chi2	16	DecisionTreeClassifier	1	0.762821	0.775641
False	std	sfs	14	DecisionTreeClassifier	1	0.762821	0.711538
True	std	sfs	14	DecisionTreeClassifier	1	0.762821	0.711538
True	std	sfs	25	DecisionTreeClassifier	1	0.762821	0.730769
True	none	sfs	14	DecisionTreeClassifier	1	0.762821	0.711538
True	none	sfs	25	DecisionTreeClassifier	1	0.762821	0.730769
False	none	chi2	1	KNeighborsClassifier	0.828526	0.762821	0.775641
False	none	chi2	16	DecisionTreeClassifier	1	0.762821	0.775641
False	none	sfs	14	DecisionTreeClassifier	1	0.762821	0.711538
False	none	sfs	13	LogisticRegression	0.860577	0.762821	0.801282
False	none	sfs	16	LogisticRegression	0.863782	0.762821	0.794872
False	none	sfs	17	LogisticRegression	0.865385	0.762821	0.801282
False	none	sfs	18	LogisticRegression	0.883013	0.762821	0.801282
False	std	chi2	1	SVC	0.793269	0.761218	0.794872
False	none	sfs	5	LogisticRegression	0.825321	0.761218	0.762821
False	none	sfs	7	LogisticRegression	0.839744	0.761218	0.782051
False	none	sfs	19	LogisticRegression	0.875	0.761218	0.814103
False	none	chi2	3	KNeighborsClassifier	0.849359	0.759615	0.788462
False	none	chi2	25	LogisticRegression	0.799679	0.759615	0.794872
False	none	sfs	8	LogisticRegression	0.844551	0.759615	0.788462
True	std	chi2	22	DecisionTreeClassifier	1	0.758013	0.801282
False	std	sfs	13	DecisionTreeClassifier	1	0.758013	0.737179
False	std	sfs	15	DecisionTreeClassifier	1	0.758013	0.762821
False	std	sfs	23	DecisionTreeClassifier	1	0.758013	0.737179
False	none	sfs	13	DecisionTreeClassifier	1	0.758013	0.737179
False	none	sfs	15	DecisionTreeClassifier	1	0.758013	0.762821
False	none	sfs	23	DecisionTreeClassifier	1	0.758013	0.737179
False	none	sfs	6	LogisticRegression	0.828526	0.758013	0.769231
True	none	chi2	22	DecisionTreeClassifier	1	0.758013	0.801282
True	std	chi2	3	DecisionTreeClassifier	1	0.75641	0.807692
True	std	sfs	15	DecisionTreeClassifier	1	0.75641	0.762821
True	none	sfs	15	DecisionTreeClassifier	1	0.75641	0.762821
False	none	chi2	19	LogisticRegression	0.780449	0.75641	0.788462
True	none	chi2	3	DecisionTreeClassifier	1	0.75641	0.807692
False	std	sfs	20	DecisionTreeClassifier	1	0.754808	0.75
False	std	sfs	3	RandomForestClassifier	0.980769	0.754808	0.711538
True	std	sfs	13	DecisionTreeClassifier	1	0.754808	0.75641
True	std	sfs	20	DecisionTreeClassifier	1	0.754808	0.75641
True	std	sfs	23	DecisionTreeClassifier	1	0.754808	0.737179
True	std	sfs	2	RandomForestClassifier	0.996795	0.754808	0.737179
True	none	sfs	13	DecisionTreeClassifier	1	0.754808	0.75641
True	none	sfs	20	DecisionTreeClassifier	1	0.754808	0.75641
True	none	sfs	23	DecisionTreeClassifier	1	0.754808	0.737179
True	none	sfs	2	RandomForestClassifier	0.996795	0.754808	0.737179
False	none	chi2	20	LogisticRegression	0.783654	0.754808	0.794872
False	none	chi2	23	LogisticRegression	0.794872	0.754808	0.788462
False	none	chi2	24	LogisticRegression	0.799679	0.754808	0.775641
False	none	sfs	20	DecisionTreeClassifier	1	0.754808	0.75
False	none	sfs	3	RandomForestClassifier	0.980769	0.754808	0.711538
False	std	chi2	20	DecisionTreeClassifier	1	0.753205	0.75641
False	std	sfs	22	DecisionTreeClassifier	1	0.753205	0.724359
True	std	sfs	22	DecisionTreeClassifier	1	0.753205	0.730769
True	none	sfs	22	DecisionTreeClassifier	1	0.753205	0.730769
False	none	chi2	20	DecisionTreeClassifier	1	0.753205	0.75641
False	none	chi2	18	LogisticRegression	0.782051	0.753205	0.788462
False	none	chi2	21	LogisticRegression	0.783654	0.753205	0.788462
False	none	sfs	22	DecisionTreeClassifier	1	0.753205	0.724359
False	std	chi2	21	DecisionTreeClassifier	1	0.751603	0.782051
False	std	chi2	23	DecisionTreeClassifier	1	0.751603	0.794872
True	std	chi2	23	DecisionTreeClassifier	1	0.751603	0.775641
True	std	sfs	18	DecisionTreeClassifier	1	0.751603	0.711538
True	none	sfs	18	DecisionTreeClassifier	1	0.751603	0.711538
False	none	chi2	21	DecisionTreeClassifier	1	0.751603	0.782051
False	none	chi2	23	DecisionTreeClassifier	1	0.751603	0.794872
False	none	chi2	22	LogisticRegression	0.783654	0.751603	0.788462
True	none	chi2	23	DecisionTreeClassifier	1	0.751603	0.775641
False	std	chi2	24	DecisionTreeClassifier	1	0.75	0.788462
False	std	chi2	25	DecisionTreeClassifier	1	0.75	0.775641
False	std	chi2	1	LogisticRegression	0.775641	0.75	0.762821
True	std	chi2	24	DecisionTreeClassifier	1	0.75	0.769231
False	std	sfs	16	DecisionTreeClassifier	1	0.75	0.737179
False	std	sfs	18	DecisionTreeClassifier	1	0.75	0.705128
False	none	chi2	24	DecisionTreeClassifier	1	0.75	0.788462
False	none	chi2	25	DecisionTreeClassifier	1	0.75	0.775641
False	none	sfs	16	DecisionTreeClassifier	1	0.75	0.737179
False	none	sfs	18	DecisionTreeClassifier	1	0.75	0.705128
True	none	chi2	24	DecisionTreeClassifier	1	0.75	0.769231
False	std	chi2	19	DecisionTreeClassifier	1	0.748397	0.762821
True	std	chi2	25	DecisionTreeClassifier	1	0.748397	0.775641
False	std	sfs	24	DecisionTreeClassifier	1	0.748397	0.737179
True	std	sfs	24	DecisionTreeClassifier	1	0.748397	0.737179
True	none	sfs	24	DecisionTreeClassifier	1	0.748397	0.737179
False	none	chi2	19	DecisionTreeClassifier	1	0.748397	0.762821
False	none	sfs	24	DecisionTreeClassifier	1	0.748397	0.737179
True	none	chi2	25	DecisionTreeClassifier	1	0.748397	0.775641
False	std	chi2	18	DecisionTreeClassifier	1	0.746795	0.782051
True	none	none	-1	DecisionTreeClassifier	1	0.746795	0.75
True	std	none	-1	DecisionTreeClassifier	1	0.746795	0.75
False	std	sfs	9	DecisionTreeClassifier	1	0.746795	0.685897
False	std	sfs	17	DecisionTreeClassifier	1	0.746795	0.769231
True	std	sfs	16	DecisionTreeClassifier	1	0.746795	0.737179
True	std	sfs	17	DecisionTreeClassifier	1	0.746795	0.782051
True	none	sfs	16	DecisionTreeClassifier	1	0.746795	0.737179
True	none	sfs	17	DecisionTreeClassifier	1	0.746795	0.782051
False	none	chi2	18	DecisionTreeClassifier	1	0.746795	0.782051
False	none	sfs	9	DecisionTreeClassifier	1	0.746795	0.685897
False	none	sfs	17	DecisionTreeClassifier	1	0.746795	0.769231
False	std	chi2	2	DecisionTreeClassifier	1	0.745192	0.74359
True	std	chi2	18	DecisionTreeClassifier	1	0.745192	0.788462
False	std	none	-1	DecisionTreeClassifier	1	0.745192	0.75
False	std	sfs	2	RandomForestClassifier	0.991987	0.745192	0.737179
False	none	chi2	2	DecisionTreeClassifier	1	0.745192	0.74359
False	none	none	-1	DecisionTreeClassifier	1	0.745192	0.75
False	none	sfs	2	RandomForestClassifier	0.991987	0.745192	0.737179
True	none	chi2	18	DecisionTreeClassifier	1	0.745192	0.788462
False	std	chi2	3	DecisionTreeClassifier	1	0.74359	0.724359
False	std	chi2	15	DecisionTreeClassifier	1	0.74359	0.74359
True	std	chi2	21	DecisionTreeClassifier	1	0.74359	0.788462
True	std	chi2	1	RandomForestClassifier	0.913462	0.74359	0.75641
True	std	sfs	9	DecisionTreeClassifier	1	0.74359	0.685897
True	std	sfs	19	DecisionTreeClassifier	1	0.74359	0.762821
True	none	sfs	9	DecisionTreeClassifier	1	0.74359	0.685897
True	none	sfs	19	DecisionTreeClassifier	1	0.74359	0.762821
False	none	chi2	3	DecisionTreeClassifier	1	0.74359	0.724359
False	none	chi2	15	DecisionTreeClassifier	1	0.74359	0.74359
False	none	chi2	17	LogisticRegression	0.775641	0.74359	0.782051
True	none	chi2	21	DecisionTreeClassifier	1	0.74359	0.788462
True	none	chi2	1	RandomForestClassifier	0.913462	0.74359	0.75641
True	std	chi2	16	DecisionTreeClassifier	1	0.741987	0.75
False	std	sfs	19	DecisionTreeClassifier	1	0.741987	0.75
False	none	chi2	16	LogisticRegression	0.772436	0.741987	0.782051
False	none	sfs	19	DecisionTreeClassifier	1	0.741987	0.75
True	none	chi2	16	DecisionTreeClassifier	1	0.741987	0.75
False	std	chi2	7	DecisionTreeClassifier	1	0.740385	0.75
False	std	sfs	8	DecisionTreeClassifier	1	0.740385	0.730769
True	std	sfs	10	DecisionTreeClassifier	1	0.740385	0.711538
True	none	sfs	10	DecisionTreeClassifier	1	0.740385	0.711538
False	none	chi2	7	DecisionTreeClassifier	1	0.740385	0.75
False	none	sfs	8	DecisionTreeClassifier	1	0.740385	0.730769
False	none	sfs	4	LogisticRegression	0.815705	0.740385	0.769231
True	std	chi2	9	DecisionTreeClassifier	1	0.738782	0.775641
True	std	chi2	15	DecisionTreeClassifier	1	0.738782	0.762821
True	none	chi2	9	DecisionTreeClassifier	1	0.738782	0.775641
True	none	chi2	15	DecisionTreeClassifier	1	0.738782	0.762821
False	std	chi2	1	GaussianNB	0.761218	0.737179	0.75641
False	std	chi2	22	DecisionTreeClassifier	1	0.737179	0.788462
True	std	chi2	19	DecisionTreeClassifier	1	0.737179	0.794872
False	std	sfs	4	DecisionTreeClassifier	1	0.737179	0.769231
False	std	sfs	10	DecisionTreeClassifier	1	0.737179	0.717949
False	none	chi2	5	KNeighborsClassifier	0.841346	0.737179	0.74359
False	none	chi2	1	GaussianNB	0.761218	0.737179	0.75641
False	none	chi2	22	DecisionTreeClassifier	1	0.737179	0.788462
False	none	sfs	4	DecisionTreeClassifier	1	0.737179	0.769231
False	none	sfs	10	DecisionTreeClassifier	1	0.737179	0.717949
True	none	chi2	19	DecisionTreeClassifier	1	0.737179	0.794872
False	std	chi2	4	DecisionTreeClassifier	1	0.735577	0.788462
False	std	chi2	8	DecisionTreeClassifier	1	0.735577	0.75
False	std	chi2	9	DecisionTreeClassifier	1	0.735577	0.74359
True	std	chi2	11	DecisionTreeClassifier	1	0.735577	0.762821
True	std	chi2	12	DecisionTreeClassifier	1	0.735577	0.717949
True	std	chi2	17	DecisionTreeClassifier	1	0.735577	0.769231
True	std	sfs	8	DecisionTreeClassifier	1	0.735577	0.724359
True	none	sfs	8	DecisionTreeClassifier	1	0.735577	0.724359
False	none	chi2	4	KNeighborsClassifier	0.839744	0.735577	0.75641
False	none	chi2	12	KNeighborsClassifier	0.825321	0.735577	0.74359
False	none	chi2	4	DecisionTreeClassifier	1	0.735577	0.788462
False	none	chi2	8	DecisionTreeClassifier	1	0.735577	0.75
False	none	chi2	9	DecisionTreeClassifier	1	0.735577	0.74359
True	none	chi2	11	DecisionTreeClassifier	1	0.735577	0.762821
True	none	chi2	12	DecisionTreeClassifier	1	0.735577	0.717949
True	none	chi2	17	DecisionTreeClassifier	1	0.735577	0.769231
False	std	chi2	6	DecisionTreeClassifier	1	0.733974	0.75
True	std	chi2	4	DecisionTreeClassifier	1	0.733974	0.807692
True	std	chi2	5	DecisionTreeClassifier	1	0.733974	0.794872
True	std	sfs	4	DecisionTreeClassifier	1	0.733974	0.775641
True	none	sfs	4	DecisionTreeClassifier	1	0.733974	0.775641
False	none	chi2	13	KNeighborsClassifier	0.826923	0.733974	0.74359
False	none	chi2	6	DecisionTreeClassifier	1	0.733974	0.75
True	none	chi2	4	DecisionTreeClassifier	1	0.733974	0.807692
True	none	chi2	5	DecisionTreeClassifier	1	0.733974	0.794872
False	std	chi2	10	DecisionTreeClassifier	1	0.732372	0.75641
False	std	chi2	12	DecisionTreeClassifier	1	0.732372	0.717949
False	none	chi2	10	DecisionTreeClassifier	1	0.732372	0.75641
False	none	chi2	12	DecisionTreeClassifier	1	0.732372	0.717949
False	none	chi2	15	LogisticRegression	0.775641	0.732372	0.782051
False	none	sfs	3	LogisticRegression	0.807692	0.732372	0.75641
False	std	chi2	11	DecisionTreeClassifier	1	0.730769	0.762821
True	std	chi2	20	DecisionTreeClassifier	1	0.730769	0.794872
False	none	chi2	11	DecisionTreeClassifier	1	0.730769	0.762821
False	none	chi2	14	LogisticRegression	0.774038	0.730769	0.762821
True	none	chi2	20	DecisionTreeClassifier	1	0.730769	0.794872
True	std	chi2	6	DecisionTreeClassifier	1	0.729167	0.75
False	std	sfs	11	DecisionTreeClassifier	1	0.729167	0.705128
False	none	sfs	11	DecisionTreeClassifier	1	0.729167	0.705128
True	none	chi2	6	DecisionTreeClassifier	1	0.729167	0.75
True	std	chi2	13	DecisionTreeClassifier	1	0.727564	0.762821
True	std	chi2	14	DecisionTreeClassifier	1	0.727564	0.75
True	std	sfs	11	DecisionTreeClassifier	1	0.727564	0.705128
True	none	sfs	11	DecisionTreeClassifier	1	0.727564	0.705128
False	none	chi2	14	KNeighborsClassifier	0.817308	0.727564	0.724359
False	none	chi2	15	KNeighborsClassifier	0.826923	0.727564	0.75641
False	none	chi2	17	KNeighborsClassifier	0.826923	0.727564	0.74359
False	none	chi2	23	KNeighborsClassifier	0.778846	0.727564	0.673077
False	none	chi2	11	LogisticRegression	0.761218	0.727564	0.737179
True	none	chi2	13	DecisionTreeClassifier	1	0.727564	0.762821
True	none	chi2	14	DecisionTreeClassifier	1	0.727564	0.75
False	std	chi2	5	DecisionTreeClassifier	1	0.725962	0.788462
False	std	chi2	17	DecisionTreeClassifier	1	0.725962	0.74359
False	none	chi2	5	DecisionTreeClassifier	1	0.725962	0.788462
False	none	chi2	17	DecisionTreeClassifier	1	0.725962	0.74359
False	std	chi2	14	DecisionTreeClassifier	1	0.724359	0.762821
False	std	sfs	6	DecisionTreeClassifier	1	0.724359	0.74359
False	none	chi2	14	DecisionTreeClassifier	1	0.724359	0.762821
False	none	chi2	13	LogisticRegression	0.777244	0.724359	0.75
False	none	sfs	6	DecisionTreeClassifier	1	0.724359	0.74359
False	none	chi2	16	KNeighborsClassifier	0.820513	0.722756	0.75
False	none	chi2	12	LogisticRegression	0.770833	0.722756	0.75
False	none	chi2	19	KNeighborsClassifier	0.782051	0.721154	0.692308
True	std	chi2	7	DecisionTreeClassifier	1	0.719551	0.775641
True	std	chi2	8	DecisionTreeClassifier	1	0.719551	0.769231
True	std	sfs	1	RandomForestClassifier	0.942308	0.719551	0.685897
True	none	sfs	1	RandomForestClassifier	0.942308	0.719551	0.685897
False	none	chi2	22	KNeighborsClassifier	0.782051	0.719551	0.685897
True	none	chi2	7	DecisionTreeClassifier	1	0.719551	0.775641
True	none	chi2	8	DecisionTreeClassifier	1	0.719551	0.769231
True	std	sfs	5	DecisionTreeClassifier	1	0.717949	0.74359
True	std	sfs	6	DecisionTreeClassifier	1	0.717949	0.74359
True	none	sfs	5	DecisionTreeClassifier	1	0.717949	0.74359
True	none	sfs	6	DecisionTreeClassifier	1	0.717949	0.74359
False	none	chi2	11	KNeighborsClassifier	0.820513	0.717949	0.730769
False	none	chi2	20	KNeighborsClassifier	0.791667	0.717949	0.692308
False	none	chi2	24	KNeighborsClassifier	0.788462	0.717949	0.685897
False	none	sfs	2	LogisticRegression	0.801282	0.717949	0.75641
False	std	chi2	13	DecisionTreeClassifier	1	0.716346	0.730769
False	std	sfs	5	DecisionTreeClassifier	1	0.716346	0.74359
False	none	chi2	21	KNeighborsClassifier	0.791667	0.716346	0.692308
False	none	chi2	13	DecisionTreeClassifier	1	0.716346	0.730769
False	none	chi2	10	LogisticRegression	0.753205	0.716346	0.711538
False	none	sfs	5	DecisionTreeClassifier	1	0.716346	0.74359
False	none	chi2	18	KNeighborsClassifier	0.782051	0.714744	0.692308
False	std	sfs	7	DecisionTreeClassifier	1	0.713141	0.737179
True	std	sfs	12	DecisionTreeClassifier	1	0.713141	0.705128
True	none	sfs	12	DecisionTreeClassifier	1	0.713141	0.705128
False	none	chi2	8	KNeighborsClassifier	0.807692	0.713141	0.692308
False	none	sfs	7	DecisionTreeClassifier	1	0.713141	0.737179
False	std	chi2	1	RandomForestClassifier	0.939103	0.711538	0.711538
True	std	chi2	1	DecisionTreeClassifier	1	0.711538	0.74359
True	std	sfs	7	DecisionTreeClassifier	1	0.711538	0.74359
True	none	sfs	7	DecisionTreeClassifier	1	0.711538	0.74359
False	none	chi2	7	KNeighborsClassifier	0.801282	0.711538	0.737179
False	none	chi2	1	RandomForestClassifier	0.939103	0.711538	0.711538
True	none	chi2	1	DecisionTreeClassifier	1	0.711538	0.74359
False	std	sfs	12	DecisionTreeClassifier	1	0.709936	0.705128
False	none	chi2	6	KNeighborsClassifier	0.807692	0.709936	0.737179
False	none	sfs	12	DecisionTreeClassifier	1	0.709936	0.705128
True	std	chi2	2	DecisionTreeClassifier	1	0.708333	0.782051
True	std	chi2	10	DecisionTreeClassifier	1	0.708333	0.75
False	none	chi2	10	KNeighborsClassifier	0.8125	0.708333	0.705128
True	none	chi2	2	DecisionTreeClassifier	1	0.708333	0.782051
True	none	chi2	10	DecisionTreeClassifier	1	0.708333	0.75
False	none	chi2	25	KNeighborsClassifier	0.785256	0.706731	0.679487
False	none	chi2	9	KNeighborsClassifier	0.801282	0.703526	0.679487
False	std	sfs	1	RandomForestClassifier	0.929487	0.700321	0.737179
False	none	sfs	1	RandomForestClassifier	0.929487	0.700321	0.737179
False	none	chi2	9	LogisticRegression	0.754808	0.698718	0.705128
False	std	sfs	2	DecisionTreeClassifier	1	0.697115	0.724359
False	std	sfs	3	DecisionTreeClassifier	1	0.697115	0.730769
False	none	sfs	2	DecisionTreeClassifier	1	0.697115	0.724359
False	none	sfs	3	DecisionTreeClassifier	1	0.697115	0.730769
False	std	chi2	1	DecisionTreeClassifier	1	0.695513	0.724359
False	none	chi2	1	DecisionTreeClassifier	1	0.695513	0.724359
True	std	sfs	2	DecisionTreeClassifier	1	0.6875	0.724359
True	none	sfs	2	DecisionTreeClassifier	1	0.6875	0.724359
False	none	chi2	8	LogisticRegression	0.74359	0.6875	0.685897
True	std	sfs	3	DecisionTreeClassifier	1	0.684295	0.730769
True	none	sfs	3	DecisionTreeClassifier	1	0.684295	0.730769
False	none	sfs	1	LogisticRegression	0.737179	0.684295	0.653846
False	none	chi2	7	LogisticRegression	0.657051	0.669872	0.628205
False	none	chi2	6	LogisticRegression	0.660256	0.650641	0.621795
False	none	none	-1	KNeighborsClassifier	0.775641	0.639423	0.634615
False	none	chi2	5	LogisticRegression	0.599359	0.628205	0.570513
False	none	chi2	4	LogisticRegression	0.599359	0.623397	0.570513
False	none	chi2	3	LogisticRegression	0.544872	0.592949	0.544872
True	std	sfs	1	DecisionTreeClassifier	1	0.583333	0.602564
True	none	sfs	1	DecisionTreeClassifier	1	0.583333	0.602564
False	std	sfs	1	DecisionTreeClassifier	1	0.578526	0.602564
False	none	sfs	1	DecisionTreeClassifier	1	0.578526	0.602564
False	none	chi2	2	LogisticRegression	0.544872	0.573718	0.544872
False	none	chi2	1	LogisticRegression	0.544872	0.549679	0.544872

## Sheet: T&T DeepLearningBasedClass
net	augmentation	val_loss	accuracy_test
resnet101	big	0.149167	89.1026
resnet18	std	0.165018	88.4615
resnet50	big	0.166834	88.4615
resnet50	std	0.171338	83.3333
resnet101	std	0.182004	85.2564
resnet18	min	0.21168	82.6923
resnet50	min	0.250617	83.9744
resnet18	auto_1	0.398203	72.4359
resnet50	auto_1	0.443996	69.2308
resnet101	min	0.480896	69.8718
resnet101	auto_2	0.488006	75.641
resnet50	auto_2	0.496644	69.8718
resnet18	auto_2	0.501738	72.4359
resnet101	auto_1	0.509396	66.6667
resnet18	big	0.558923	65.3846
